# Supplementary material for: 3D-structured illumination microscopy reveals clustered DNA double-strand break formation in widespread γH2AX foci after high LET heavy-ion particle radiation
Source: PubMed Central journal article supplement (PMC5752527; doi:10.18632/oncotarget.22679), 2017-11-25
Supplement: oncotarget-08-109370-s001.pdf [file oncotarget-08-109370-s001.pdf]

### 3D-structured illumination microscopy reveals clustered DNA double-strand break formation in widespread $\gamma$ H2AX foci after high LET heavy-ion particle radiation

#### SUPPLEMENTARY MATERIALS

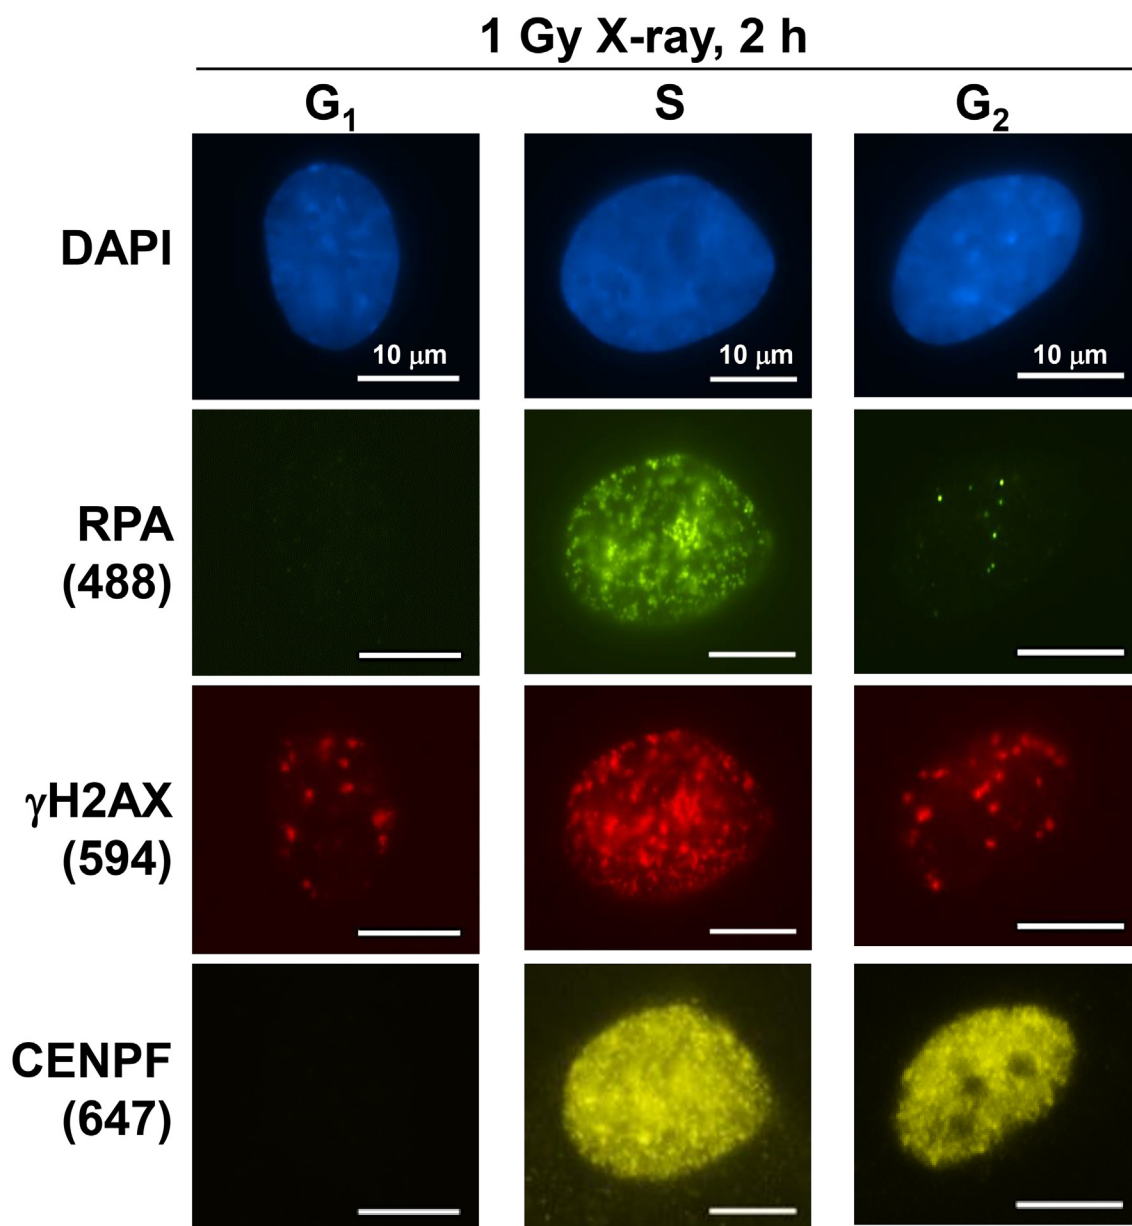

**Supplementary Figure 1: Identification of irradiated G<sub>2</sub> cells using CENPF.** 1BR hTERT cells were stained with RPA,  $\gamma$ H2AX, and CENPF antibodies. G<sub>1</sub> cells were identified as CENPF<sup>-</sup> and  $\gamma$ H2AX foci<sup>+</sup> (not pan-nuclear  $\gamma$ H2AX). S cells were identified as CENPF<sup>+</sup> and pan-nuclear  $\gamma$ H2AX. G<sub>2</sub> cells were identified as CENPF<sup>+</sup> and  $\gamma$ H2AX foci<sup>+</sup> (not pan-nuclear  $\gamma$ H2AX).

C-ion, LET 60 keV/ $\mu\text{m}$

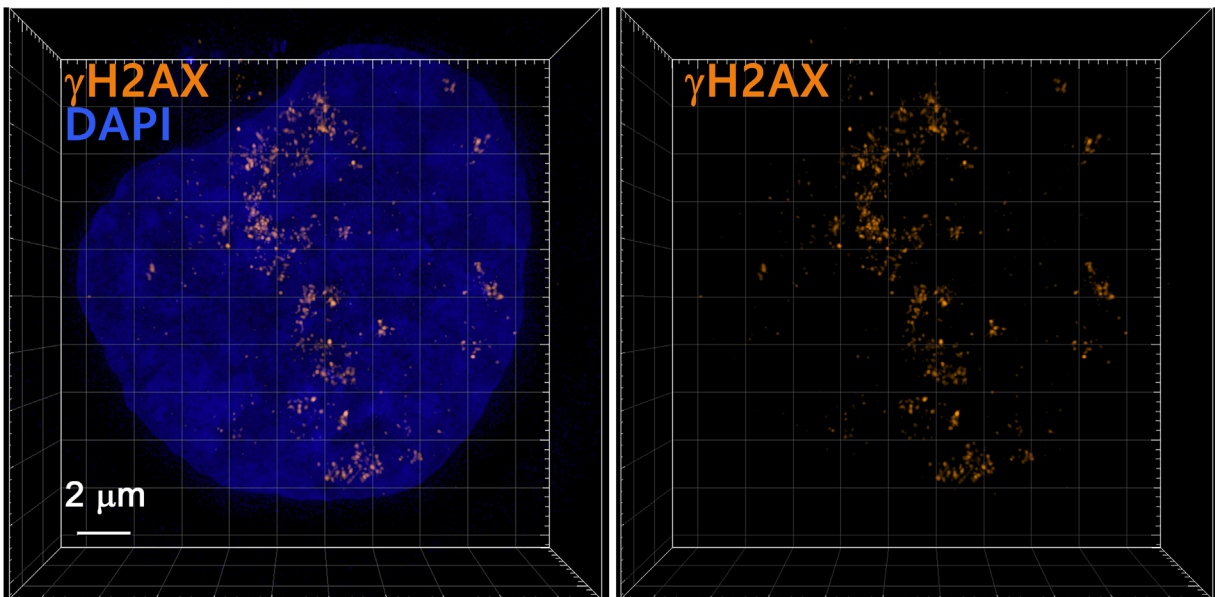

X-rays

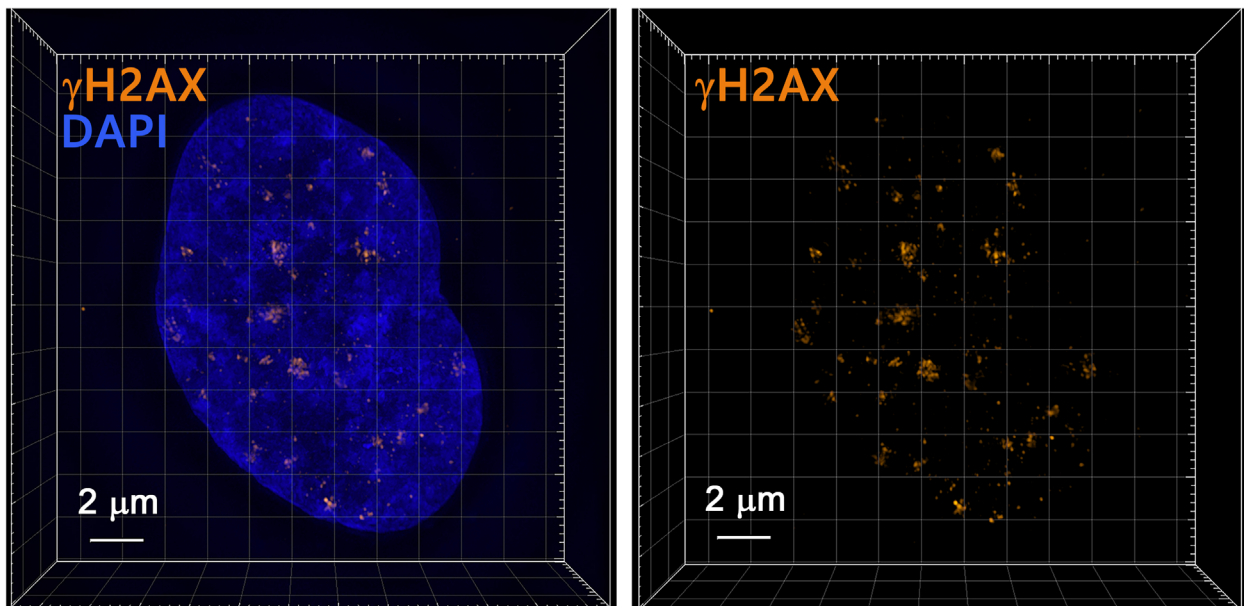

Supplementary Figure 2: Raw image for Figure 1. The raw image of Figure 1 is shown.

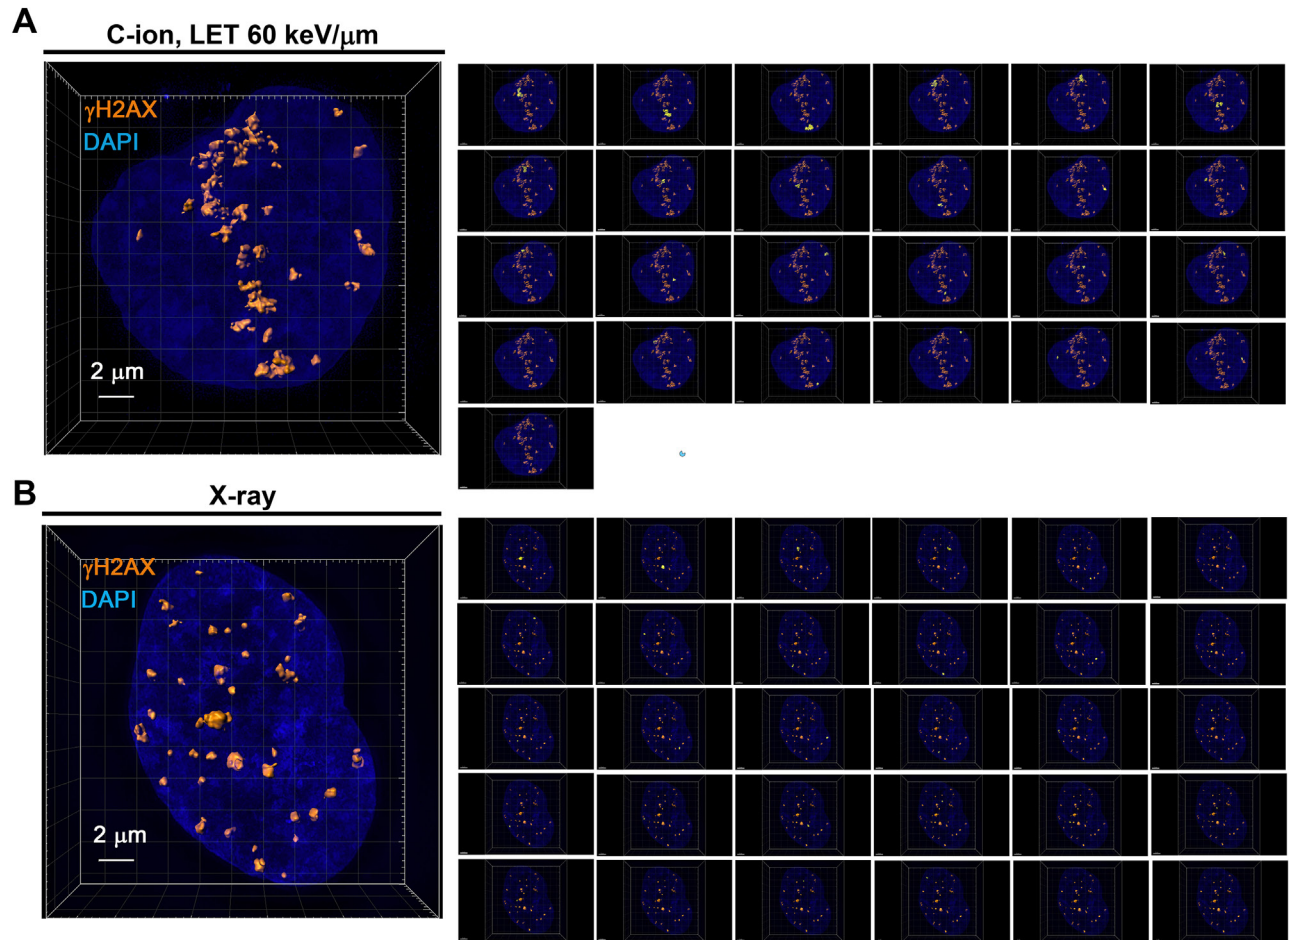

**Supplementary Figure 3: Identification of individual  $\gamma\text{H2AX}$  foci along the track.** Individual  $\gamma\text{H2AX}$  signals after C-ion (A) or X-ray irradiation (B) were identified following polygon rendering using Imaris 8.1.2. Each  $\gamma\text{H2AX}$  focus is highlighted in yellow.

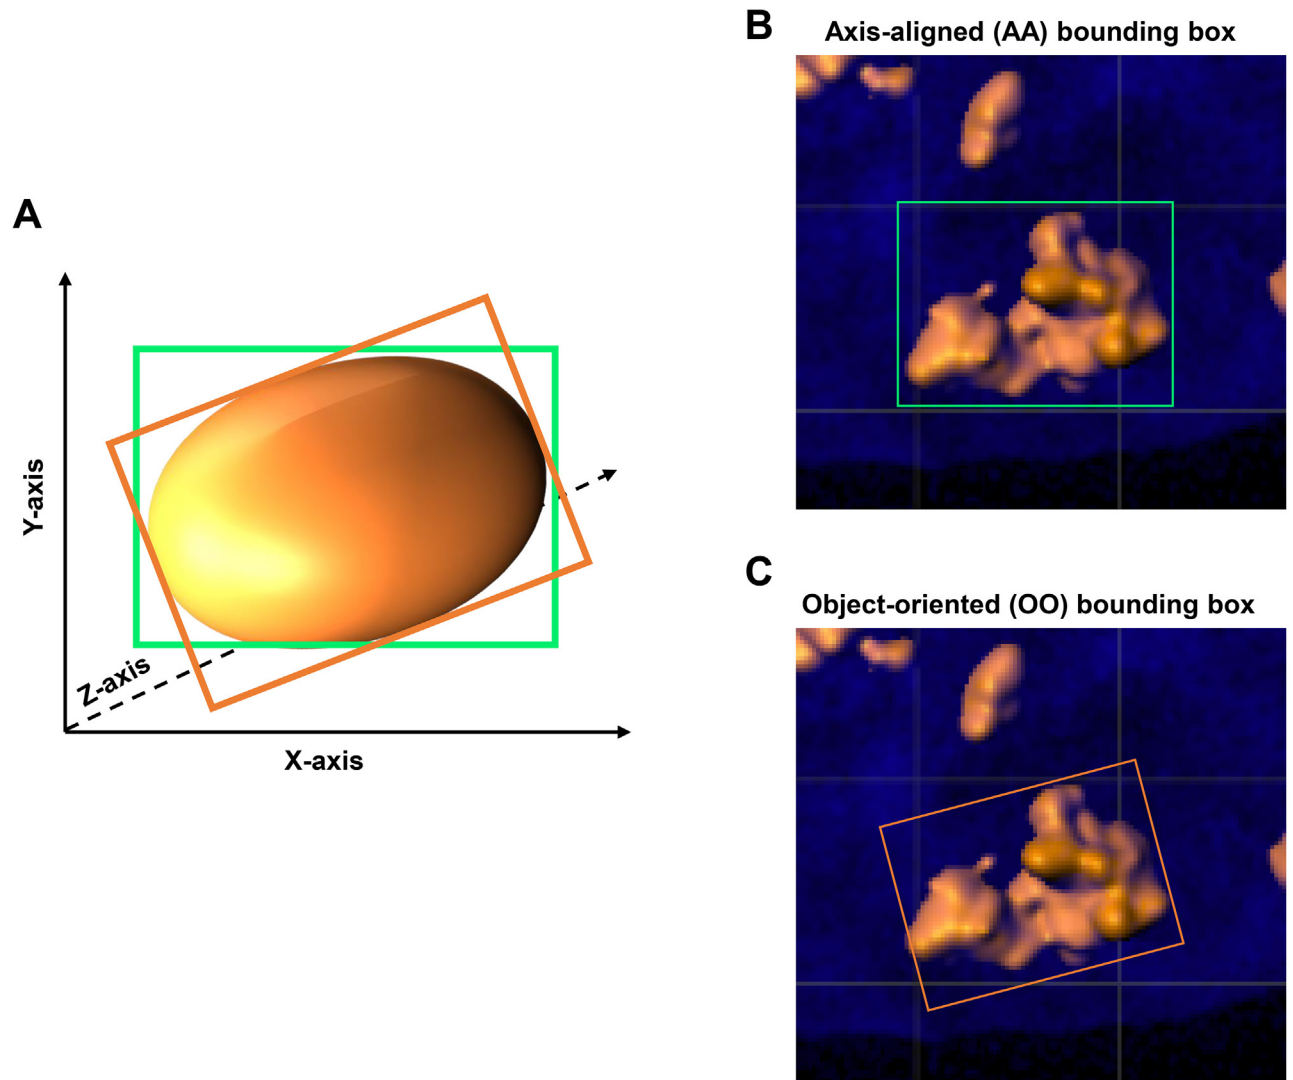

**Supplementary Figure 4: Analysis of the axis-aligned (AA) and object-oriented (OO) bounding box.** (A) Representative modeling of the AA and OO bounding box is shown. (B, C) Representative image of the AA and OO bounding box in the x-y axis is shown.



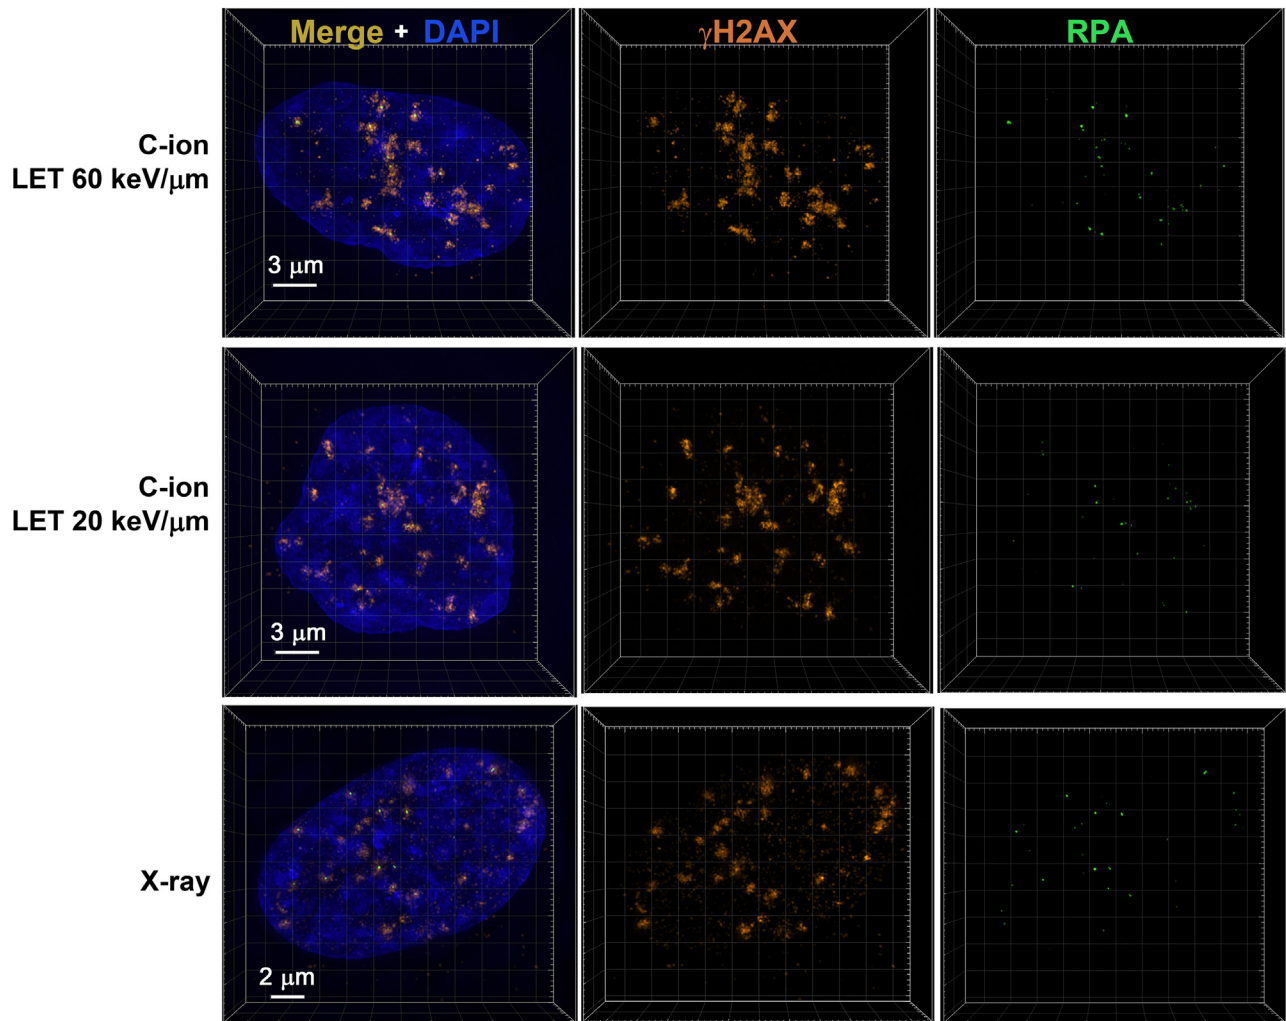

Supplementary Figure 5: Raw image for Figure 2. The raw image of Figure 2 is shown.

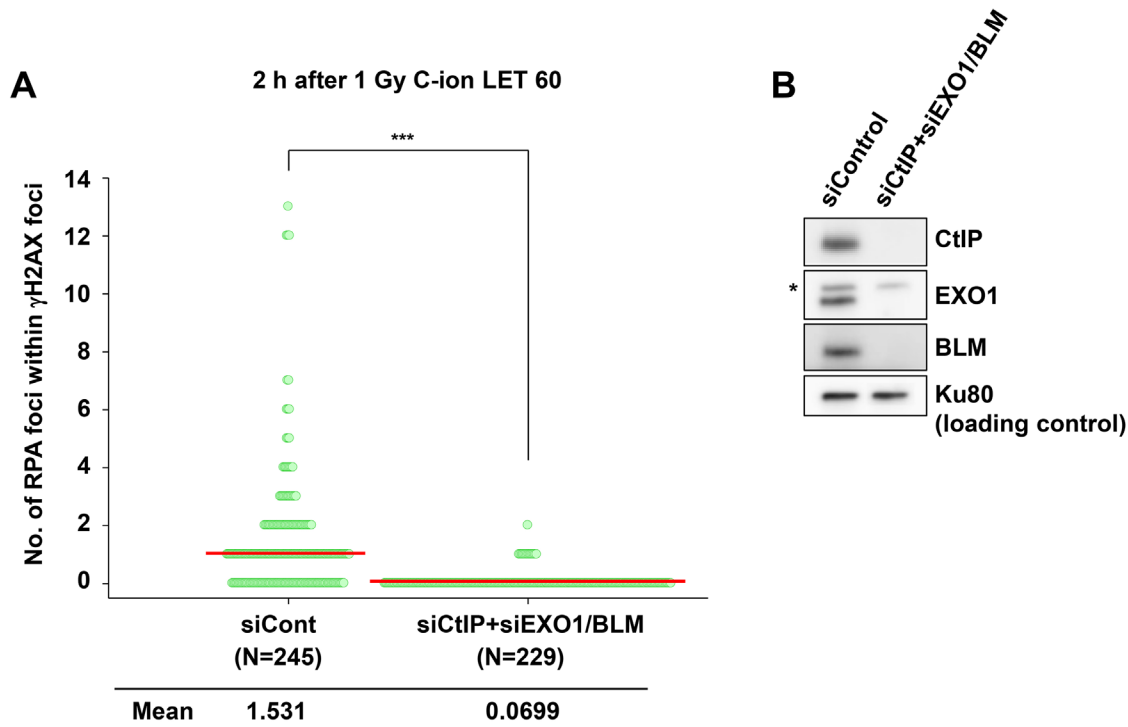

**Supplementary Figure 6: RPA foci within  $\gamma$ H2AX foci require CtIP/EXO1/BLM-dependent DNA end resection.** (A) siRNA transfection of 1BR hTERT cells was performed using Lipofectamine™ RNAiMAX Transfection Reagent (Thermo, Rochester, NY, USA). ON-TARGETplus siRNA (20  $\mu$ M, Dharmacon) was added to suspended cells after trypsinization. For the 2<sup>nd</sup> shot of siRNA, cells were re-transfected with siRNA in suspended cells after trypsinization at 24 h after 1<sup>st</sup> transfection. Cells were incubated for 48 h after the second transfection before IR. RPA foci within  $\gamma$ H2AX foci were examined using the SIM image on the screen of Imaris 8.1.2 (B) Knockdown efficiency was confirmed by immunoblotting. The asterisk represents a non-specific signal. Ku80 was used as the loading control.

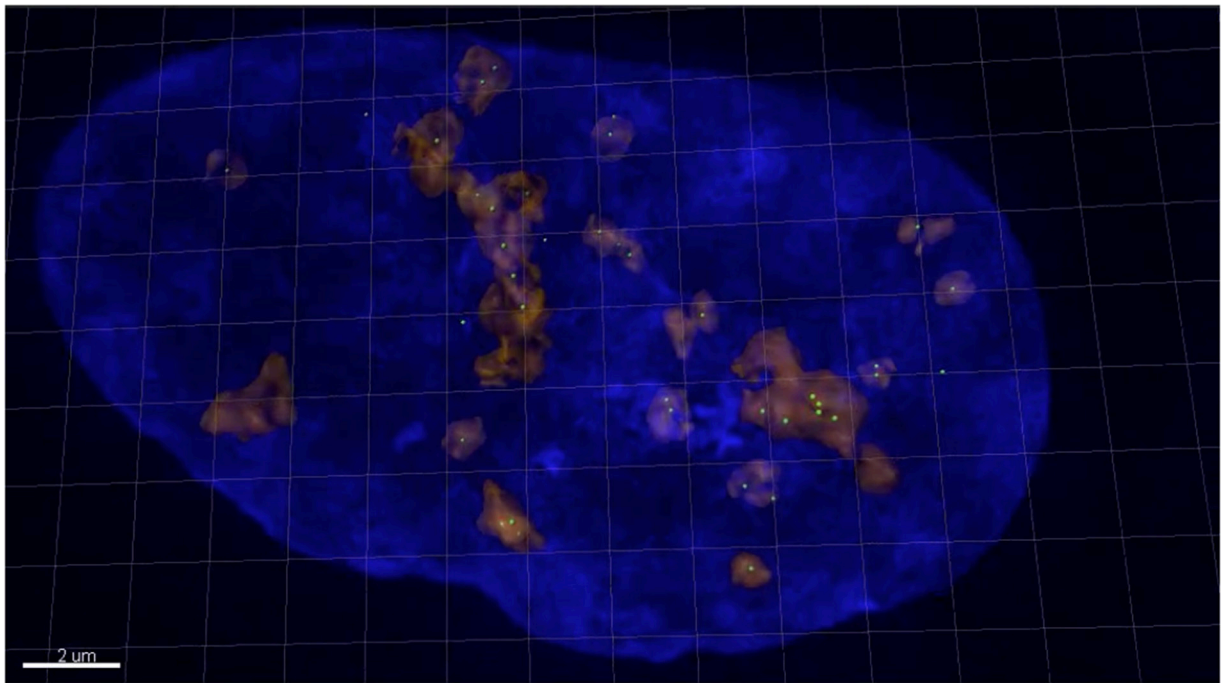

**Supplementary Movie 1:** The movie of cells with RPA and  $\gamma$ H2AX polygon is shown. 1BR hTERT cells were fixed 2 h after 1 Gy C-ion irradiation with LET 60 keV/ $\mu$ m. Cells were stained with RPA,  $\gamma$ H2AX, and CENPF antibodies.

**Supplementary Table 1: The percentage of RPA foci number in  $\gamma$ H2AX foci at 2 h after IR**

| No of RPA foci with $\gamma$ H2AX foci | C-ion LET 60 (%) | C-ion LET 20 (%) | X-ray (%) |
|----------------------------------------|------------------|------------------|-----------|
| 0                                      | 24.5             | 51.2             | 47.5      |
| 1                                      | 46.6             | 37.8             | 42        |
| 2                                      | 13.2             | 6.8              | 8         |
| 3                                      | 7.0              | 1.5              | 1.9       |
| 4                                      | 3.2              | 1.4              | 0.2       |
| 5                                      | 1.5              | 1.0              | 0.3       |
| 6                                      | 1.7              | 0.1              | 0.1       |
| 7                                      | 1.0              | 0.1              | 0         |
| >8                                     | 1.3              | 0.1              | 0         |



**Supplementary Table 2: List of antibodies used in the present study**

| Target        | Mono/polyclonal | Clone/reference | Antibody raised in | Source                      | Dilution for I.F.<br>or I.B. |
|---------------|-----------------|-----------------|--------------------|-----------------------------|------------------------------|
| BLM           | Poly            | Ab2179          | Rabbit             | Abcam                       | 1:1000 (I.B.)                |
| CENPF         | Poly            | Ab5             | Rabbit             | Abcam                       | 1:1000 (I.F.)                |
| CtIP          | Mono            | D76F7           | Rabbit             | Cell Signaling Technology   | 1:1000 (I.B.)                |
| EXO1          | Poly            | A302-640A       | Rabbit             | Bethyl Laboratories, Inc.   | 1:1000 (I.B.)                |
| $\gamma$ H2AX | Mono            | JBW301          | Mouse              | Upstate Biotechnology       | 1:800 (I.F.)                 |
| Ku80          | Mono            | C48E7           | Rabbit             | Cell Signaling Technology   | 1:1000 (I.B.)                |
| RPA32         | Mono            | LS-C38952       | Rat                | Life Span BioSciences, Inc. | 1:1000 (I.F.)                |

I.B., immunoblotting; I.F., Immunofluorescence.
